# Supplementary material for: Transcriptomics combined with physiological analysis reveals the mechanism of cadmium uptake and tolerance in Ligusticum chuanxiong Hort. under cadmium treatment
Source: Front Plant Sci. 2023 Sep 22;14:1263981. doi: 10.3389/fpls.2023.1263981 (PMC10556529; doi:10.3389/fpls.2023.1263981)
Supplement: Supplementary file 1 [file Table_1.docx]

## Sheet: Table S1
Table S1. The selected 10 genes and the primers used in qRT-PCR analysis
Gene_id	Gene_name	Forward primer Sequence (5'->3')	Reverse primer Sequence (5'->3')
TRINITY_DN16600_c0_g1	petE	GGTGATGACGGTGGACTTGT	CGAAAGTCTCTCCTGGTGCA
TRINITY_DN12533_c0_g2	petC	GCGACAAAACCCTAGCAACC	CAGAGCCAAGGACAGAGGAG
TRINITY_DN9184_c0_g1	ERF1	GCGCCACAAGAAATATCCGA	ATGTACCAAGCCACACCCTT
TRINITY_DN34195_c0_g1	ARF	ACCAAAGCCGCCTATCCATT	TGTGCTTGAATCGCCACTCA
TRINITY_DN14287_c0_g1	SOD1	TGCTCCTGAAGATGAAGTCCG	AAGGCTAAGCTCATGACCACC
TRINITY_DN13638_c0_g1	GH3	GTCGAGTGCAGGAGAAGGTC	ACATGGTGCAGACAAGAGGG
TRINITY_DN5515_c0_g1	GPX	GAGCAGCCACAGAGAAGACC	TCGTCAGCCCACATTTCGAA
TRINITY_DN8807_c0_g1	E3.1.1.11	CGCATTTGGTGATGTCCGTG	TGACCCGTGCTGTTGTCTTT
TRINITY_DN10041_c0_g2	F6H	CGTGTTGCTGCGAATGGAAG	CCTTCCCGTCATGCCCTTTT
TRINITY_DN8882_c0_g3	COMT	GCACGGACCCTCGATTCAATA	AAGACCCCAGACCTTCGAAAC
Normalization Control	Actin	CCCAAGGCCAATAGGGAGAAG	CCAGAATCCAGCACCATACCAG

## Sheet: Table S2
Table S2 Sequencing results for each sample
Sample	Clean reads	Q20(%)	Q30(%)	GC content(%)
Cd40_3	45438056	97.78	93.61	43.08
Cd40_2	41366068	97.61	93.25	42.97
Cd40_1	50060426	97.62	93.29	42.82
Cd20_3	43039280	97.4	92.69	43.02
Cd20_2	45015992	97.32	92.42	42.56
Cd20_1	42628406	97.52	92.98	42.69
CK3	43802954	97.38	92.59	42.67
CK2	47423782	97.54	93.03	43.03
CK1	44230092	97.74	93.53	42.81

## Sheet: Table S3
	Table S3 GO Term
	Term Type	Term description	GO ID	num
Cd20	biological_process	cell killing	GO:0001906	5
	biological_process	immune system process	GO:0002376	10
	biological_process	carbon utilization	GO:0015976	2
	biological_process	biological regulation	GO:0065007	434
	biological_process	metabolic process	GO:0008152	985
	biological_process	multi-organism process	GO:0051704	45
	biological_process	locomotion	GO:0040011	1
	biological_process	reproductive process	GO:0022414	73
	biological_process	reproduction	GO:0000003	2
	biological_process	cell population proliferation	GO:0008283	1
	biological_process	cellular component organization or biogenesis	GO:0071840	150
	biological_process	cellular process	GO:0009987	1089
	biological_process	developmental process	GO:0032502	73
	biological_process	multicellular organismal process	GO:0032501	43
	biological_process	growth	GO:0040007	10
	biological_process	rhythmic process	GO:0048511	18
	biological_process	localization	GO:0051179	211
	biological_process	detoxification	GO:0098754	3
	biological_process	signaling	GO:0023052	3
	biological_process	nitrogen utilization	GO:0019740	2
	biological_process	response to stimulus	GO:0050896	352
	cellular_component	membrane-enclosed lumen	GO:0031974	11
	cellular_component	protein-containing complex	GO:0032991	232
	cellular_component	membrane part	GO:0044425	1214
	cellular_component	extracellular region part	GO:0044421	19
	cellular_component	organelle part	GO:0044422	330
	cellular_component	organelle	GO:0043226	723
	cellular_component	membrane	GO:0016020	434
	cellular_component	cell junction	GO:0030054	25
	cellular_component	extracellular region	GO:0005576	144
	cellular_component	nucleoid	GO:0009295	3
	cellular_component	cell part	GO:0044464	1333
	cellular_component	supramolecular complex	GO:0099080	9
	molecular_function	translation regulator activity	GO:0045182	20
	molecular_function	transcription regulator activity	GO:0140110	153
	molecular_function	structural molecule activity	GO:0005198	38
	molecular_function	protein folding chaperone	GO:0044183	6
	molecular_function	molecular carrier activity	GO:0140104	3
	molecular_function	antioxidant activity	GO:0016209	45
	molecular_function	transporter activity	GO:0005215	234
	molecular_function	toxin activity	GO:0090729	3
	molecular_function	molecular function regulator	GO:0098772	65
	molecular_function	small molecule sensor activity	GO:0140299	5
	molecular_function	binding	GO:0005488	1522
	molecular_function	nutrient reservoir activity	GO:0045735	6
	molecular_function	protein tag	GO:0031386	2
	molecular_function	molecular transducer activity	GO:0060089	26
	molecular_function	catalytic activity	GO:0003824	1559
Cd40	biological_process	cell killing	GO:0001906	5
	biological_process	immune system process	GO:0002376	16
	biological_process	carbon utilization	GO:0015976	2
	biological_process	biological regulation	GO:0065007	680
	biological_process	metabolic process	GO:0008152	1535
	biological_process	multi-organism process	GO:0051704	68
	biological_process	locomotion	GO:0040011	1
	biological_process	reproductive process	GO:0022414	135
	biological_process	reproduction	GO:0000003	1
	biological_process	cell population proliferation	GO:0008283	3
	biological_process	cellular component organization or biogenesis	GO:0071840	278
	biological_process	cellular process	GO:0009987	1744
	biological_process	developmental process	GO:0032502	132
	biological_process	multicellular organismal process	GO:0032501	65
	biological_process	growth	GO:0040007	16
	biological_process	rhythmic process	GO:0048511	16
	biological_process	localization	GO:0051179	372
	biological_process	detoxification	GO:0098754	7
	biological_process	signaling	GO:0023052	2
	biological_process	nitrogen utilization	GO:0019740	2
	biological_process	response to stimulus	GO:0050896	474
	cellular_component	membrane-enclosed lumen	GO:0031974	23
	cellular_component	protein-containing complex	GO:0032991	356
	cellular_component	membrane part	GO:0044425	1923
	cellular_component	extracellular region part	GO:0044421	27
	cellular_component	organelle part	GO:0044422	527
	cellular_component	organelle	GO:0043226	1192
	cellular_component	membrane	GO:0016020	683
	cellular_component	cell junction	GO:0030054	58
	cellular_component	extracellular region	GO:0005576	192
	cellular_component	nucleoid	GO:0009295	2
	cellular_component	other organism part	GO:0044217	3
	cellular_component	cell part	GO:0044464	2166
	cellular_component	supramolecular complex	GO:0099080	30
	molecular_function	translation regulator activity	GO:0045182	20
	molecular_function	transcription regulator activity	GO:0140110	224
	molecular_function	structural molecule activity	GO:0005198	67
	molecular_function	protein folding chaperone	GO:0044183	10
	molecular_function	molecular carrier activity	GO:0140104	3
	molecular_function	antioxidant activity	GO:0016209	60
	molecular_function	transporter activity	GO:0005215	386
	molecular_function	toxin activity	GO:0090729	5
	molecular_function	molecular function regulator	GO:0098772	103
	molecular_function	small molecule sensor activity	GO:0140299	6
	molecular_function	binding	GO:0005488	2405
	molecular_function	nutrient reservoir activity	GO:0045735	6
	molecular_function	protein tag	GO:0031386	2
	molecular_function	molecular transducer activity	GO:0060089	42
	molecular_function	catalytic activity	GO:0003824	2523

## Sheet: Table S4
	Table S4 KEGG Pathway
	Num	Pathway id	Description	Pvalue_uncorrected	Pvalue_corrected
Cd 20 kegg pathway	44	map00195	Photosynthesis	8.58778e-26	1.01336e-23
	28	map00196	Photosynthesis - antenna proteins	7.17356e-24	4.2324e-22
	42	map01040	Biosynthesis of unsaturated fatty acids	5.25517e-22	2.06703e-20
	20	map04712	Circadian rhythm - plant	5.60976e-08	1.3239e-06
	44	map00940	Phenylpropanoid biosynthesis	5.2112e-08	1.5373e-06
	59	map04075	Plant hormone signal transduction	3.40191e-07	6.69042e-06
	17	map00860	Porphyrin and chlorophyll metabolism	4.35045e-05	0.000733361
	11	map00908	Zeatin biosynthesis	0.00185969	0.0274305
	12	map00130	Ubiquinone and other terpenoid-quinone biosynthesis	0.00232845	0.0305286
	21	map00480	Glutathione metabolism	0.00286353	0.0337896
	21	map00710	Carbon fixation in photosynthetic organisms	0.00371699	0.0398732
	21	map00040	Pentose and glucuronate interconversions	0.0056061	0.0551266
	11	map00910	Nitrogen metabolism	0.00695404	0.0631213
	11	map00906	Carotenoid biosynthesis	0.00789132	0.0665126
	9	map00073	Cutin, suberine and wax biosynthesis	0.00917303	0.0721612
	5	map00905	Brassinosteroid biosynthesis	0.0176937	0.130491
	14	map00380	Tryptophan metabolism	0.0189831	0.131765
	7	map00590	Arachidonic acid metabolism	0.0212296	0.131847
	8	map00941	Flavonoid biosynthesis	0.0209284	0.137198
	17	map00630	Glyoxylate and dicarboxylate metabolism	0.0363051	0.2142
	29	map04016	MAPK signaling pathway - plant	0.0426547	0.239679
	19	map00270	Cysteine and methionine metabolism	0.0643484	0.330135
	6	map00591	Linoleic acid metabolism	0.0618625	0.331808
	6	map00904	Diterpenoid biosynthesis	0.076815	0.377674
	10	map00640	Propanoate metabolism	0.120628	0.569365
	6	map00760	Nicotinate and nicotinamide metabolism	0.132588	0.601748
	9	map00061	Fatty acid biosynthesis	0.164061	0.667557
	6	map00920	Sulfur metabolism	0.177974	0.677451
	13	map00071	Fatty acid degradation	0.155811	0.680952
	17	map04146	Peroxisome	0.173234	0.681386
	12	map00260	Glycine, serine and threonine metabolism	0.162084	0.683066
	5	map00950	Isoquinoline alkaloid biosynthesis	0.237954	0.684843
	11	map00592	alpha-Linolenic acid metabolism	0.237062	0.699334
	7	map00360	Phenylalanine metabolism	0.23114	0.699347
	5	map00960	Tropane, piperidine and pyridine alkaloid biosynthesis	0.222989	0.711154
	3	map00750	Vitamin B6 metabolism	0.230001	0.714212
	8	map00900	Terpenoid backbone biosynthesis	0.220816	0.723785
	1	map00254	Aflatoxin biosynthesis	0.219686	0.740655
	8	map00350	Tyrosine metabolism	0.265658	0.746374
	1	map00942	Anthocyanin biosynthesis	0.281619	0.772816
	1	map00944	Flavone and flavonol biosynthesis	0.281619	0.772816
	1	map00523	Polyketide sugar unit biosynthesis	0.281619	0.772816
	1	map00998	Biosynthesis of various secondary metabolites - part 2	0.281619	0.772816
	10	map00330	Arginine and proline metabolism	0.210979	0.777984
	11	map00250	Alanine, aspartate and glutamate metabolism	0.219014	0.78314
	11	map02010	ABC transporters	0.219014	0.78314
	6	map00460	Cyanoamino acid metabolism	0.340263	0.81941
	1	map00601	Glycosphingolipid biosynthesis - lacto and neolacto series	0.338641	0.832493
	4	map00062	Fatty acid elongation	0.356239	0.840725
	4	map00740	Riboflavin metabolism	0.337689	0.847815
	29	map04626	Plant-pathogen interaction	0.382023	0.866897
	4	map00909	Sesquiterpenoid and triterpenoid biosynthesis	0.374783	0.867145
	2	map00261	Monobactam biosynthesis	0.395493	0.880531
	3	map00945	Stilbenoid, diarylheptanoid and gingerol biosynthesis	0.407596	0.890674
	8	map03030	DNA replication	0.423262	0.90809
	12	map03040	Spliceosome	0.999979	0.999979
	1	map00901	Indole alkaloid biosynthesis	0.483975	1
	14	map00564	Glycerophospholipid metabolism	0.510166	1
	5	map00220	Arginine biosynthesis	0.522701	1
	1	map00965	Betalain biosynthesis	0.524945	1
	22	map00500	Starch and sucrose metabolism	0.545018	1
	3	map00450	Selenocompound metabolism	0.552511	1
	1	map00440	Phosphonate and phosphinate metabolism	0.562664	1
	11	map00561	Glycerolipid metabolism	0.597515	1
	4	map04130	SNARE interactions in vesicular transport	0.600013	1
	7	map00410	beta-Alanine metabolism	0.625225	1
	7	map00030	Pentose phosphate pathway	0.625225	1
	1	map00903	Limonene and pinene degradation	0.629363	1
	1	map00966	Glucosinolate biosynthesis	0.629363	1
	1	map00902	Monoterpenoid biosynthesis	0.658797	1
	1	map00300	Lysine biosynthesis	0.658797	1
	19	map00010	Glycolysis / Gluconeogenesis	0.660841	1
	2	map00290	Valine, leucine and isoleucine biosynthesis	0.663141	1
	7	map00052	Galactose metabolism	0.679223	1
	2	map00730	Thiamine metabolism	0.68207	1
	1	map00603	Glycosphingolipid biosynthesis - globo and isoglobo series	0.710844	1
	2	map00670	One carbon pool by folate	0.717308	1
	5	map00051	Fructose and mannose metabolism	0.77103	1
	6	map00053	Ascorbate and aldarate metabolism	0.783385	1
	13	map00620	Pyruvate metabolism	0.799682	1
	9	map04145	Phagosome	0.822181	1
	1	map00531	Glycosaminoglycan degradation	0.824031	1
	25	map01240	Biosynthesis of cofactors	0.827479	1
	3	map00770	Pantothenate and CoA biosynthesis	0.832065	1
	3	map00565	Ether lipid metabolism	0.832065	1
	1	map00780	Biotin metabolism	0.838014	1
	6	map00240	Pyrimidine metabolism	0.86134	1
	3	map00400	Phenylalanine, tyrosine and tryptophan biosynthesis	0.872417	1
	2	map00650	Butanoate metabolism	0.874284	1
	26	map04141	Protein processing in endoplasmic reticulum	0.875377	1
	3	map00100	Steroid biosynthesis	0.879375	1
	11	map00520	Amino sugar and nucleotide sugar metabolism	0.888941	1
	4	map03020	RNA polymerase	0.898941	1
	8	map00230	Purine metabolism	0.949613	1
	4	map00020	Citrate cycle (TCA cycle)	0.952386	1
	1	map00790	Folate biosynthesis	0.956965	1
	4	map03420	Nucleotide excision repair	0.957421	1
	1	map00340	Histidine metabolism	0.963539	1
	2	map00310	Lysine degradation	0.969635	1
	10	map03018	RNA degradation	0.970898	1
	23	map03010	Ribosome	0.971446	1
	2	map03430	Mismatch repair	0.971688	1
	6	map04070	Phosphatidylinositol signaling system	0.974638	1
	2	map03410	Base excision repair	0.975399	1
	1	map00513	Various types of N-glycan biosynthesis	0.975913	1
	18	map04144	Endocytosis	0.979473	1
	4	map03440	Homologous recombination	0.979857	1
	1	map00600	Sphingolipid metabolism	0.981219	1
	14	map00190	Oxidative phosphorylation	0.984143	1
	11	map04120	Ubiquitin mediated proteolysis	0.991774	1
	1	map00510	N-Glycan biosynthesis	0.994122	1
	2	map00280	Valine, leucine and isoleucine degradation	0.994152	1
	1	map03060	Protein export	0.995418	1
	5	map00562	Inositol phosphate metabolism	0.996745	1
	3	map00970	Aminoacyl-tRNA biosynthesis	0.997488	1
	12	map03013	Nucleocytoplasmic transport	0.997984	1
	8	map03015	mRNA surveillance pathway	0.998467	1
	4	map03008	Ribosome biogenesis in eukaryotes	0.999773	1
Cd 40 kegg pathway	52	map01040	Biosynthesis of unsaturated fatty acids	4.82026e-22	6.12172e-20
	47	map00195	Photosynthesis	1.76068e-19	1.11803e-17
	19	map00196	Photosynthesis - antenna proteins	3.33757e-08	1.4129e-06
	57	map00940	Phenylpropanoid biosynthesis	2.58008e-06	8.19175e-05
	80	map04075	Plant hormone signal transduction	1.14395e-05	0.000290563
	20	map00130	Ubiquinone and other terpenoid-quinone biosynthesis	5.58559e-05	0.00118228
	23	map00051	Fructose and mannose metabolism	0.000208901	0.0033163
	19	map00910	Nitrogen metabolism	0.000184111	0.0033403
	28	map00592	alpha-Linolenic acid metabolism	0.000314818	0.00444243
	38	map00270	Cysteine and methionine metabolism	0.000422943	0.00537138
	33	map00710	Carbon fixation in photosynthetic organisms	0.000726999	0.00839353
	18	map00360	Phenylalanine metabolism	0.0010678	0.0104316
	14	map00941	Flavonoid biosynthesis	0.00119805	0.010868
	24	map00030	Pentose phosphate pathway	0.00103374	0.0109404
	20	map00350	Tyrosine metabolism	0.002098	0.0166529
	13	map00950	Isoquinoline alkaloid biosynthesis	0.0023456	0.017523
	31	map00480	Glutathione metabolism	0.00208489	0.0176521
	12	map00062	Fatty acid elongation	0.00283261	0.0189338
	8	map00905	Brassinosteroid biosynthesis	0.00274437	0.0193631
	19	map00061	Fatty acid biosynthesis	0.00574703	0.0291949
	31	map00040	Pentose and glucuronate interconversions	0.00512886	0.0296075
	12	map00960	Tropane, piperidine and pyridine alkaloid biosynthesis	0.00565353	0.0299166
	18	map00860	Porphyrin and chlorophyll metabolism	0.00618359	0.0302045
	29	map00630	Glyoxylate and dicarboxylate metabolism	0.00501964	0.0303568
	11	map00590	Arachidonic acid metabolism	0.00555199	0.0306566
	50	map04016	MAPK signaling pathway - plant	0.00497347	0.0315815
	11	map00904	Diterpenoid biosynthesis	0.00865563	0.0392595
	3	map00523	Polyketide sugar unit biosynthesis	0.00845499	0.0397698
	69	map04141	Protein processing in endoplasmic reticulum	0.0118228	0.0517758
	25	map00071	Fatty acid degradation	0.0140973	0.0577534
	13	map00908	Zeatin biosynthesis	0.0139721	0.0591485
	10	map00591	Linoleic acid metabolism	0.0162439	0.064468
	46	map00010	Glycolysis / Gluconeogenesis	0.0209419	0.075989
	33	map00564	Glycerophospholipid metabolism	0.019761	0.0760499
	12	map00920	Sulfur metabolism	0.0206988	0.0773162
	63	map01240	Biosynthesis of cofactors	0.0222158	0.0783724
	35	map00520	Amino sugar and nucleotide sugar metabolism	0.0236246	0.0810897
	20	map00380	Tryptophan metabolism	0.0261234	0.0873073
	31	map04146	Peroxisome	0.0328228	0.106884
	14	map04712	Circadian rhythm - plant	0.0392413	0.124591
	13	map00460	Cyanoamino acid metabolism	0.0490916	0.152064
	9	map00909	Sesquiterpenoid and triterpenoid biosynthesis	0.0661037	0.199885
	16	map00640	Propanoate metabolism	0.0787751	0.232661
	19	map00250	Alanine, aspartate and glutamate metabolism	0.105915	0.30571
	11	map00770	Pantothenate and CoA biosynthesis	0.117103	0.316427
	17	map00410	beta-Alanine metabolism	0.113939	0.321561
	17	map00330	Arginine and proline metabolism	0.113939	0.321561
	9	map00760	Nicotinate and nicotinamide metabolism	0.121973	0.322721
	44	map00500	Starch and sucrose metabolism	0.128326	0.3326
	2	map00601	Glycosphingolipid biosynthesis - lacto and neolacto series	0.134268	0.341041
	19	map00260	Glycine, serine and threonine metabolism	0.138341	0.344497
	9	map00073	Cutin, suberine and wax biosynthesis	0.14977	0.365784
	17	map00052	Galactose metabolism	0.160263	0.376915
	5	map00780	Biotin metabolism	0.158917	0.3808
	11	map00906	Carotenoid biosynthesis	0.180565	0.416942
	2	map00524	Neomycin, kanamycin and gentamicin biosynthesis	0.184223	0.417792
	23	map00561	Glycerolipid metabolism	0.201356	0.448635
	3	map00903	Limonene and pinene degradation	0.207156	0.453599
	7	map00740	Riboflavin metabolism	0.214215	0.461107
	7	map00790	Folate biosynthesis	0.234721	0.496827
	1	map00232	Caffeine metabolism	0.248248	0.508508
	3	map00430	Taurine and hypotaurine metabolism	0.244411	0.508856
	10	map00220	Arginine biosynthesis	0.270748	0.545793
	14	map00280	Valine, leucine and isoleucine degradation	0.27683	0.549334
	15	map00053	Ascorbate and aldarate metabolism	0.291281	0.560496
	2	map00901	Indole alkaloid biosynthesis	0.288789	0.564249
	9	map00565	Ether lipid metabolism	0.324561	0.606165
	3	map00603	Glycosphingolipid biosynthesis - globo and isoglobo series	0.321213	0.608867
	2	map00965	Betalain biosynthesis	0.340899	0.609777
	1	map00254	Aflatoxin biosynthesis	0.348213	0.614209
	5	map00945	Stilbenoid, diarylheptanoid and gingerol biosynthesis	0.340545	0.626801
	5	map00730	Thiamine metabolism	0.340545	0.626801
	2	map00440	Phosphonate and phosphinate metabolism	0.391731	0.681505
	15	map02010	ABC transporters	0.440033	0.725769
	9	map00400	Phenylalanine, tyrosine and tryptophan biosynthesis	0.423776	0.727291
	1	map00604	Glycosphingolipid biosynthesis - ganglio series	0.434891	0.736415
	1	map00998	Biosynthesis of various secondary metabolites - part 2	0.434891	0.736415
	46	map04626	Plant-pathogen interaction	0.490672	0.788801
	2	map00966	Glucosinolate biosynthesis	0.487414	0.79361
	5	map00450	Selenocompound metabolism	0.531718	0.833682
	3	map00750	Vitamin B6 metabolism	0.542332	0.839953
	3	map00531	Glycosaminoglycan degradation	0.542332	0.839953
	2	map00902	Monoterpenoid biosynthesis	0.531596	0.843909
	26	map00620	Pyruvate metabolism	0.559346	0.845678
	1	map00943	Isoflavonoid biosynthesis	0.575211	0.859433
	4	map00670	One carbon pool by folate	0.605384	0.893997
	8	map03060	Protein export	0.647941	0.945845
	2	map00261	Monobactam biosynthesis	0.681141	0.98301
	4	map03008	Ribosome biogenesis in eukaryotes	1	1
	5	map00650	Butanoate metabolism	0.713331	1
	1	map00660	C5-Branched dibasic acid metabolism	0.723177	1
	7	map00100	Steroid biosynthesis	0.734338	1
	3	map00290	Valine, leucine and isoleucine biosynthesis	0.739115	1
	17	map04145	Phagosome	0.747551	1
	18	map00230	Purine metabolism	0.825634	1
	1	map00300	Lysine biosynthesis	0.84362	1
	15	map04070	Phosphatidylinositol signaling system	0.869999	1
	4	map00600	Sphingolipid metabolism	0.897123	1
	9	map00020	Citrate cycle (TCA cycle)	0.906011	1
	3	map00340	Histidine metabolism	0.915605	1
	10	map00240	Pyrimidine metabolism	0.917217	1
	7	map03050	Proteasome	0.926681	1
	4	map04130	SNARE interactions in vesicular transport	0.928432	1
	21	map03018	RNA degradation	0.930431	1
	6	map00900	Terpenoid backbone biosynthesis	0.935256	1
	5	map00310	Lysine degradation	0.944799	1
	3	map00513	Various types of N-glycan biosynthesis	0.949453	1
	2	map00511	Other glycan degradation	0.95156	1
	15	map00562	Inositol phosphate metabolism	0.952147	1
	25	map04120	Ubiquitin mediated proteolysis	0.958388	1
	4	map00510	N-Glycan biosynthesis	0.972657	1
	1	map00563	Glycosylphosphatidylinositol (GPI)-anchor biosynthesis	0.991025	1
	5	map03030	DNA replication	0.994933	1
	3	map03410	Base excision repair	0.996078	1
	30	map04144	Endocytosis	0.996535	1
	4	map03020	RNA polymerase	0.996647	1
	6	map03440	Homologous recombination	0.998047	1
	4	map04136	Autophagy - other	0.998069	1
	7	map00970	Aminoacyl-tRNA biosynthesis	0.998146	1
	35	map03010	Ribosome	0.998945	1
	2	map03430	Mismatch repair	0.99911	1
	4	map03420	Nucleotide excision repair	0.999443	1
	1	map03022	Basal transcription factors	0.999955	1
	12	map03015	mRNA surveillance pathway	0.999988	1
	17	map03013	Nucleocytoplasmic transport	0.999995	1
	25	map03040	Spliceosome	0.999996	1
	13	map00190	Oxidative phosphorylation	1	1

## Sheet: Table S5
Table S5 Common significant difference pathways
Num	Pathway id	Description	Pvalue_uncorrected	Pvalue_corrected	UP	DOWN
42	map00195	Photosynthesis	6.78563e-30	7.66776e-28	0	42
39	map01040	Biosynthesis of unsaturated fatty acids	9.02318e-25	5.0981e-23	37	2
38	map04075	Plant hormone signal transduction	0.000253592	0.00573118	14	24
31	map00940	Phenylpropanoid biosynthesis	5.03916e-06	0.000142356	14	17
21	map04016	MAPK signaling pathway - plant	0.0561046	0.275644	16	5
19	map00196	Photosynthesis - antenna proteins	7.23623e-15	2.72564e-13	0	19
19	map00710	Carbon fixation in photosynthetic organisms	0.000279009	0.00525466	4	15
18	map00480	Glutathione metabolism	0.000594879	0.00960304	13	5
16	map00630	Glyoxylate and dicarboxylate metabolism	0.00295366	0.0303421	4	12
11	map00860	Porphyrin and chlorophyll metabolism	0.00211472	0.0265515	2	9
10	map00910	Nitrogen metabolism	0.00153313	0.0216554	3	7
10	map04712	Circadian rhythm - plant	0.00252495	0.0285319	1	9
9	map00130	Ubiquinone and other terpenoid-quinone biosynthesis	0.00538823	0.0468361	2	7
7	map00590	Arachidonic acid metabolism	0.00313652	0.0295356	5	2

## Sheet: Table S6
Table S6 Differential expression genes in photosynthetic pathways
	Gene id	Description	Gene name	Expression level
Photosynthesis	TRINITY_DN12799_c0_g5	photosystem I subunit O	psaO	DOWN
	TRINITY_DN6127_c0_g1	photosystem II core complex proteins psbY, chloroplastic	psbY	DOWN
	TRINITY_DN18002_c0_g1	photosystem II 22 kDa protein, chloroplastic	SAUR	DOWN
	TRINITY_DN19706_c0_g2	ferredoxin--NADP reductase, leaf-type isozyme, chloroplastic isoform X1	petH	DOWN
	TRINITY_DN12530_c0_g1	oxygen-evolving enhancer protein 3-2, chloroplastic-like	psbQ	DOWN
	TRINITY_DN15760_c0_g2	photosystem I reaction center subunit psaK, chloroplastic	psaK	DOWN
	TRINITY_DN297_c0_g2	ferredoxin, leaf L-A-like	petF	DOWN
	TRINITY_DN297_c0_g1	ferredoxin, leaf L-A-like	petF	DOWN
	TRINITY_DN13303_c0_g1	photosynthetic NDH subunit of lumenal location 3, chloroplastic	psbQ	DOWN
	TRINITY_DN2944_c0_g1	photosystem I reaction center subunit XI, chloroplastic	psaL	DOWN
	TRINITY_DN17218_c0_g1	ferredoxin-like isoform X1	petF	DOWN
	TRINITY_DN7915_c0_g4	photosystem II CP43 chlorophyll apoprotein	psbC	DOWN
	TRINITY_DN16600_c0_g1	plastocyanin A, chloroplastic	petE	DOWN
	TRINITY_DN16966_c0_g1	photosystem I reaction center subunit V, chloroplastic	psaG	DOWN
	TRINITY_DN7193_c0_g2	photosystem I reaction center subunit III, chloroplastic	psaF	DOWN
	TRINITY_DN7193_c0_g3	photosystem I reaction center subunit III, chloroplastic	psaF	DOWN
	TRINITY_DN8708_c0_g2	oxygen-evolving enhancer protein 2, chloroplastic	psbP	DOWN
	TRINITY_DN2696_c0_g2	ATP synthase gamma chain, chloroplastic	ATPF1G, atpG	DOWN
	TRINITY_DN2696_c0_g1	ATP synthase gamma chain, chloroplastic	ATPF1G, atpG	DOWN
	TRINITY_DN9246_c0_g1	oxygen-evolving enhancer protein 3-2, chloroplastic	psbQ	DOWN
	TRINITY_DN12533_c0_g2	cytochrome b6-f complex iron-sulfur subunit, chloroplastic	petC	DOWN
	TRINITY_DN1750_c0_g3	oxygen-evolving enhancer protein 1, chloroplastic-like	psbO	DOWN
	TRINITY_DN1750_c0_g2	oxygen-evolving enhancer protein 1, chloroplastic-like	psbO	DOWN
	TRINITY_DN1798_c0_g1	photosystem II reaction center W protein, chloroplastic-like	psbW	DOWN
	TRINITY_DN19862_c0_g1	photosystem II 10 kDa polypeptide, chloroplastic-like	psbR	DOWN
	TRINITY_DN6202_c0_g1	photosynthetic NDH subunit of lumenal location 2, chloroplastic	psbQ	DOWN
	TRINITY_DN7662_c0_g2	photosystem I reaction center subunit N, chloroplastic	psaN	DOWN
	TRINITY_DN4692_c0_g1	ferredoxin-2 isoform X1	petF	DOWN
	TRINITY_DN2369_c0_g1	photosystem II 10 kDa polypeptide, chloroplastic-like	psbR	DOWN
	TRINITY_DN8991_c0_g1	hypothetical protein DCAR_002990	ATPF1D, atpH	DOWN
	TRINITY_DN33606_c0_g1	psbP-like protein 1, chloroplastic	psbP	DOWN
	TRINITY_DN6499_c0_g1	photosystem II repair protein PSB27-H1, chloroplastic	psb27	DOWN
	TRINITY_DN4586_c0_g1	photosystem I reaction center subunit II, chloroplastic-like	psaD	DOWN
	TRINITY_DN10_c1_g2	oxygen-evolving enhancer protein 2-1, chloroplastic-like	psbP	DOWN
	TRINITY_DN10204_c0_g1	ATP synthase delta chain, chloroplastic-like	ATPF1D, atpH	DOWN
	TRINITY_DN13167_c0_g1	ferredoxin-1	petF	DOWN
	TRINITY_DN3948_c0_g1	photosystem II reaction center W protein, chloroplastic-like	psbW	DOWN
	TRINITY_DN14111_c0_g1	ATP synthase subunit b', chloroplastic	ATPF0B, atpF	DOWN
	TRINITY_DN12255_c0_g1	photosystem II reaction center PSB28 protein, chloroplastic	psb28	DOWN
	TRINITY_DN8009_c0_g1	photosystem I reaction center subunit VI, chloroplastic-like	psaH	DOWN
	TRINITY_DN6547_c0_g2	photosystem I reaction center subunit IV A, chloroplastic-like	psaE	DOWN
	TRINITY_DN6547_c0_g1	photosystem I reaction center subunit IV, chloroplastic	psaE	DOWN
Photosynthesis - antenna proteins	TRINITY_DN9112_c0_g1	light-harvestig a/b binding protein, partial	LHCB1	DOWN
	TRINITY_DN1160_c0_g1	chlorophyll a-b binding protein 13, chloroplastic	LHCB3	DOWN
	TRINITY_DN7265_c0_g2	chlorophyll a-b binding protein, chloroplastic-like	LHCB1	DOWN
	TRINITY_DN39312_c0_g1	photosystem I chlorophyll a/b-binding protein 5, chloroplastic	LHCA5	DOWN
	TRINITY_DN6978_c0_g1	chlorophyll a-b binding protein 7, chloroplastic	LHCA2	DOWN
	TRINITY_DN2687_c0_g2	chlorophyll a-b binding protein 37, chloroplastic	LHCB2	DOWN
	TRINITY_DN6813_c0_g1	hypothetical protein AG4045_022258	LHCA3	DOWN
	TRINITY_DN1238_c0_g1	chlorophyll a-b binding protein, chloroplastic-like	LHCB1	DOWN
	TRINITY_DN13950_c0_g1	photosystem I chlorophyll a/b-binding protein 6, chloroplastic	LHCA2	DOWN
	TRINITY_DN5049_c0_g1	chlorophyll a-b binding protein CP26, chloroplastic-like	LHCB5	DOWN
	TRINITY_DN1232_c0_g1	Chlorophyll a-b binding protein	LHCB1	DOWN
	TRINITY_DN7425_c0_g1	chlorophyll a-b binding protein CP26, chloroplastic	LHCB5	DOWN
	TRINITY_DN6962_c0_g2	hypothetical protein AG4045_016912	LHCA4	DOWN
	TRINITY_DN10161_c0_g1	unnamed protein product	LHCB1	DOWN
	TRINITY_DN6962_c0_g1	hypothetical protein AG4045_016912	LHCA4	DOWN
	TRINITY_DN17760_c0_g1	chlorophyll a-b binding protein, chloroplastic	LHCB1	DOWN
	TRINITY_DN33277_c0_g1	light harvesting chlorophyll a /b binding protein, partial	LHCB1	DOWN
	TRINITY_DN19456_c0_g1	chlorophyll a-b binding protein 6A, chloroplastic-like	LHCA1	DOWN
	TRINITY_DN17760_c0_g4	chlorophyll a-b binding protein, chloroplastic-like	LHCB1	DOWN
Carbon fixation in photosynthetic organisms	TRINITY_DN7573_c0_g1	phosphoribulokinase, chloroplastic-like	PRK, prkB	DOWN
	TRINITY_DN3064_c0_g2	phosphoenolpyruvate carboxylase 2	ppc	DOWN
	TRINITY_DN2175_c0_g2	fructose-1,6-bisphosphatase, chloroplastic-like	FBP, fbp	DOWN
	TRINITY_DN18205_c0_g1	glutamate--glyoxylate aminotransferase 2	GGAT	DOWN
	TRINITY_DN31_c0_g1	phosphoenolpyruvate carboxykinase [ATP]-like	E4.1.1.49, pckA	DOWN
	TRINITY_DN6369_c0_g1	phosphoglycerate kinase, cytosolic-like	PGK, pgk	UP
	TRINITY_DN2175_c0_g1	fructose-1,6-bisphosphatase, chloroplastic-like	FBP, fbp	DOWN
	TRINITY_DN1910_c0_g1	hypothetical protein HHK36_015631	GGAT	UP
	TRINITY_DN12554_c0_g1	glyceraldehyde-3-phosphate dehydrogenase B, chloroplastic-like	GAPA	DOWN
	TRINITY_DN2984_c0_g1	fructose-bisphosphate aldolase 1, chloroplastic	ALDO	DOWN
	TRINITY_DN23087_c0_g1	fructose-bisphosphate aldolase, cytoplasmic isozyme 1	ALDO	DOWN
	TRINITY_DN6199_c1_g1	glyceraldehyde-3-phosphate dehydrogenase GAPCP2, chloroplastic-like	GAPDH, gapA	UP
	TRINITY_DN5306_c0_g1	glyceraldehyde-3-phosphate dehydrogenase A, chloroplastic-like	GAPA	DOWN
	TRINITY_DN5196_c0_g1	ribulose bisphosphate carboxylase small chain 1B, chloroplastic-like	rbcS, cbbS	DOWN
	TRINITY_DN1108_c0_g1	glyceraldehyde-3-phosphate dehydrogenase B, chloroplastic	GAPA	DOWN
	TRINITY_DN7534_c0_g1	alanine aminotransferase, partial	GGAT	DOWN
	TRINITY_DN20380_c0_g1	glyceraldehyde-3-phosphate dehydrogenase GAPC1, cytosolic	GAPDH, gapA	UP
	TRINITY_DN5196_c0_g2	ribulose bisphosphate carboxylase small chain 1B, chloroplastic-like	rbcS, cbbS	DOWN
	TRINITY_DN25230_c0_g2	ribulose-phosphate 3-epimerase, chloroplastic	rpe, RPE	DOWN

## Sheet: Table S7
Table S7 Differentially Expressed Genes in Plant Hormone Signal Transduction
	Gene id	Description	Gene name	Expression level
Ethylene	TRINITY_DN14732_c0_g3	EIN3-binding F-box protein 2-like	EBF1_2	UP
	TRINITY_DN9184_c0_g1	ethylene-responsive transcription factor 1B-like	ERF1	UP
	TRINITY_DN21221_c0_g1	ethylene receptor 2-like	ETR, ERS	UP
	TRINITY_DN12049_c0_g1	ethylene-responsive transcription factor 1B-like	ERF1	UP
	TRINITY_DN18070_c0_g1	ethylene response sensor 1 isoform X1	ETR, ERS	UP
	TRINITY_DN10400_c0_g1	ethylene-responsive transcription factor 1B-like	ERF1	UP
Auxin/IAA	TRINITY_DN13951_c0_g1	indole-3-acetic acid-amido synthetase GH3.6-like	GH3	DOWN
	TRINITY_DN1573_c0_g1	auxin-responsive protein IAA16-like	IAA	DOWN
	TRINITY_DN1573_c2_g1	auxin-responsive protein IAA16-like	IAA	DOWN
	TRINITY_DN16483_c0_g1	indoleacetic acid-induced protein 16, partial	IAA	DOWN
	TRINITY_DN1241_c0_g2	auxin-responsive protein IAA4-like	IAA	DOWN
	TRINITY_DN1846_c0_g1	auxin-responsive protein IAA27-like	IAA	DOWN
	TRINITY_DN11652_c0_g1	probable indole-3-acetic acid-amido synthetase GH3.1	GH3	DOWN
	TRINITY_DN34195_c0_g1	auxin response factor 18-like	K14486, ARF	DOWN
	TRINITY_DN23526_c0_g1	probable indole-3-acetic acid-amido synthetase GH3.1	GH3	DOWN
	TRINITY_DN1846_c1_g1	auxin-responsive protein IAA27	IAA	DOWN
	TRINITY_DN13638_c0_g1	indole-3-acetic acid-amido synthetase GH3.6-like	GH3	DOWN
	TRINITY_DN8951_c0_g1	auxin-responsive protein IAA26-like	IAA	UP
	TRINITY_DN20539_c0_g1	auxin-induced protein 6B-like	SAUR	UP
	TRINITY_DN45488_c0_g2	auxin-responsive protein SAUR71-like	SAUR	UP
	TRINITY_DN16292_c0_g1	auxin-induced protein 15A-like	SAUR	UP
ABA	TRINITY_DN6960_c0_g1	Abscisic acid receptor like	PYL	DOWN
	TRINITY_DN9103_c0_g1	probable protein phosphatase 2C 6	PP2C	DOWN
Salicylic acid/SA	TRINITY_DN11064_c0_g1	transcription factor TGA2-like	TGA	DOWN
	TRINITY_DN17959_c0_g1	transcription factor TGA2-like	TGA	DOWN
	TRINITY_DN17959_c0_g2	transcription factor TGA2-like	TGA	DOWN
	TRINITY_DN19671_c0_g1	transcription factor TGA2-like isoform X3	TGA	DOWN
	TRINITY_DN21482_c0_g2	transcription factor TGA1-like isoform X1	TGA	DOWN
Gibberellin/GA	TRINITY_DN22334_c0_g1	gibberellin receptor GID1C-like	GID1	UP
Jasmonic acid/JA	TRINITY_DN42675_c0_g1	jasmonic acid-amido synthetase JAR1	GH3	UP
	TRINITY_DN20337_c0_g1	jasmonic acid-amido synthetase JAR1-like	JAR1_4_6	DOWN

## Sheet: Table S8
Table S8 Differentially Expressed Genes in Antioxidant system and Glutathione pathway
	Gene id	Description	Gene name	Expression level
Antioxidant system	TRINITY_DN7273_c1_g1	lignin-forming anionic peroxidase-like	E1.11.1.7	UP
	TRINITY_DN3783_c0_g3	protein OVEREXPRESSOR OF CATIONIC PEROXIDASE 3	——	UP
	TRINITY_DN14116_c0_g1	peroxidase 9	E1.11.1.7	DOWN
	TRINITY_DN5515_c0_g1	probable phospholipid hydroperoxide glutathione peroxidase	gpx, btuE, bsaA	DOWN
	TRINITY_DN12964_c0_g2	peroxidase 12-like	E1.11.1.7	DOWN
	TRINITY_DN12964_c0_g1	peroxidase 12-like	E1.11.1.7	DOWN
	TRINITY_DN14381_c0_g1	lignin-forming anionic peroxidase-like	E1.11.1.7	UP
	TRINITY_DN19483_c0_g1	anionic peroxidase	E1.11.1.7	UP
	TRINITY_DN1354_c0_g1	probable phospholipid hydroperoxide glutathione peroxidase	gpx, btuE, bsaA	DOWN
	TRINITY_DN5446_c0_g1	peroxidase 3	E1.11.1.7	DOWN
	TRINITY_DN14287_c0_g1	superoxide dismutase [Cu-Zn], chloroplastic	SOD1	DOWN
	TRINITY_DN14596_c0_g1	peroxidase 3	E1.11.1.7	DOWN
	TRINITY_DN3527_c1_g2	probable phospholipid hydroperoxide glutathione peroxidase	gpx, btuE, bsaA	UP
	TRINITY_DN6155_c0_g1	probable glutathione peroxidase 2	gpx, btuE, bsaA	UP
	TRINITY_DN10191_c0_g3	peroxidase 42	E1.11.1.7	DOWN
	TRINITY_DN5266_c0_g1	uncharacterized protein LOC108213189 isoform X2	TSA	DOWN
	TRINITY_DN22628_c0_g1	peroxidase 27-like	E1.11.1.7	DOWN
	TRINITY_DN1294_c0_g3	peroxiredoxin Q, chloroplastic-like	BCP, PRXQ, DOT5	DOWN
	TRINITY_DN16070_c0_g1	peroxidase 17	E1.11.1.7	DOWN
	TRINITY_DN15477_c0_g1	peroxidase 25	E1.11.1.7	DOWN
	TRINITY_DN12662_c0_g1	peroxiredoxin-2E, chloroplastic	TSA	DOWN
	TRINITY_DN424_c1_g5	glutathione reductase, cytosolic	GSR, gor	UP
	TRINITY_DN16396_c0_g1	zinc finger protein ZAT5	ZAT5	DOWN
	TRINITY_DN61587_c1_g3	probable glutathione peroxidase 8	gpx, btuE, bsaA	UP
	TRINITY_DN20423_c0_g1	hypothetical protein DCAR_008403	gpx, btuE, bsaA	UP
	TRINITY_DN7233_c0_g1	probable peroxygenase 4 isoform X1	PXG	DOWN
	TRINITY_DN6346_c0_g1	peroxidase 12-like	E1.11.1.7	UP
	TRINITY_DN50684_c0_g1	peroxidase 27-like	E1.11.1.7	UP
	TRINITY_DN24210_c0_g1	putative L-ascorbate peroxidase 6 isoform X1	E1.11.1.11	DOWN
	TRINITY_DN31410_c0_g1	peroxidase P7-like	E1.11.1.7	UP
	TRINITY_DN16172_c0_g1	peroxidase 5-like	E1.11.1.7	UP
	TRINITY_DN29270_c0_g1	respiratory burst oxidase homolog protein E	RBOH	UP
	TRINITY_DN7929_c0_g4	peroxidase 5-like	E1.11.1.7	DOWN
	TRINITY_DN8706_c0_g1	peroxidase 3-like	E1.11.1.7	DOWN
	TRINITY_DN27112_c0_g1	peroxiredoxin Q, chloroplastic-like	BCP, PRXQ, DOT5	DOWN
Glutathione pathway	TRINITY_DN59269_c0_g1	probable glutathione S-transferase parC	GST, gst	UP
	TRINITY_DN3527_c1_g2	probable phospholipid hydroperoxide glutathione peroxidase	gpx, btuE, bsaA	UP
	TRINITY_DN7305_c0_g1	glutathione transferase GST 23-like	GST, gst	UP
	TRINITY_DN6155_c0_g1	probable glutathione peroxidase 2	gpx, btuE, bsaA	UP
	TRINITY_DN7305_c0_g2	glutathione transferase GST 23-like	GST, gst	UP
	TRINITY_DN7115_c0_g2	glutathione transferase GST 23-like	GST, gst	UP
	TRINITY_DN3862_c0_g1	glutathione S-transferase U15-like	GST, gst	UP
	TRINITY_DN1841_c2_g1	probable glutathione S-transferase	GST, gst	UP
	TRINITY_DN61587_c1_g3	probable glutathione peroxidase 8	gpx, btuE, bsaA	UP
	TRINITY_DN20423_c0_g1	hypothetical protein DCAR_008403	gpx, btuE, bsaA	UP
	TRINITY_DN4491_c0_g2	glutathione S-transferase L3-like isoform X1	GST, gst	UP
	TRINITY_DN3339_c0_g3	glucose-6-phosphate 1-dehydrogenase, cytoplasmic-like	G6PD, zwf	UP
	TRINITY_DN424_c1_g5	glutathione reductase, cytosolic	GSR, gor	UP
	TRINITY_DN24210_c0_g1	putative L-ascorbate peroxidase 6 isoform X1	E1.11.1.11	DOWN
	TRINITY_DN877_c0_g1	probable glutathione S-transferase	GST, gst	DOWN
	TRINITY_DN11072_c0_g1	glutathione S-transferase U17-like	GST, gst	DOWN
	TRINITY_DN1354_c0_g1	probable phospholipid hydroperoxide glutathione peroxidase	gpx, btuE, bsaA	DOWN
	TRINITY_DN5515_c0_g1	probable phospholipid hydroperoxide glutathione peroxidase	gpx, btuE, bsaA	DOWN

## Sheet: Table S9
Table S9 Differentially Expressed Genes in Cell wall modification
	Gene id	Description	Gene name	Expression level
Pectinesterase/pectinesterase inhibitor	TRINITY_DN8807_c0_g1	pectinesterase/pectinesterase inhibitor PPE8B-like	E3.1.1.11	UP
	TRINITY_DN7271_c0_g1	pectinesterase	E3.1.1.11	UP
	TRINITY_DN17414_c0_g1	probable pectinesterase/pectinesterase inhibitor 12 isoform X1	E3.1.1.11	UP
	TRINITY_DN10749_c0_g1	probable pectinesterase/pectinesterase inhibitor 17	E3.1.1.11	UP
	TRINITY_DN25996_c0_g2	F-box/LRR-repeat protein 3	FBXL2_20	UP
	TRINITY_DN7906_c0_g3	probable pectinesterase/pectinesterase inhibitor 25	E3.1.1.11	DOWN
	TRINITY_DN3118_c0_g1	probable pectinesterase/pectinesterase inhibitor 51	E3.1.1.11	UP
	TRINITY_DN24429_c0_g1	pectinesterase	E3.1.1.11	UP
	TRINITY_DN65330_c0_g1	hypothetical protein DCAR_026039	DCAR	UP
	TRINITY_DN20159_c0_g1	pectinesterase-like	E3.1.1.11	DOWN
	TRINITY_DN8399_c0_g1	probable pectinesterase/pectinesterase inhibitor 51	E3.1.1.11	DOWN
	TRINITY_DN16914_c0_g1	probable pectinesterase/pectinesterase inhibitor 41	E3.1.1.11	UP
	TRINITY_DN23827_c0_g1	probable pectinesterase 53	E3.1.1.11	DOWN
Cellulose synthase A	TRINITY_DN23819_c0_g1	cellulose synthase A catalytic subunit 7	CESA	UP
Biosynthetic pathway of lignin	TRINITY_DN15299_c0_g1	laccase 1	E1.10.3.2	DOWN
	TRINITY_DN2310_c0_g1	laccase-14-like isoform X2	E1.10.3.2	UP
	TRINITY_DN8290_c0_g1	laccase-14-like	E1.10.3.2	UP
	TRINITY_DN8882_c0_g3	caffeic acid-O-methyltransferase	COMT	UP
	TRINITY_DN8882_c1_g1	bergaptol O-methyltransferase	COMT	UP
	TRINITY_DN9849_c0_g1	probable cinnamyl alcohol dehydrogenase 6 isoform X1	CAD	DOWM

## Sheet: Table S10
Table S9 Differentially Expressed Genes in Transporter protein
	Gene id	Description	Gene name	Expression level
ABC transporter	TRINITY_DN3444_c1_g2	ABC transporter C family member 3-like isoform X1	ABCC2	DOWN
	TRINITY_DN10436_c0_g1	ABC transporter B family member 4-like	ABCB1	UP
	TRINITY_DN814_c0_g2	ABC transporter C family member 3-like	ABCC2	UP
	TRINITY_DN6994_c0_g1	ABC transporter C family member 10-like	ABCC2	UP
	TRINITY_DN7076_c0_g1	ABC transporter C family member 5-like	ABCC2	UP
	TRINITY_DN7930_c0_g2	ABC transporter B family member 4-like isoform X2	ABCB1	UP
	TRINITY_DN7930_c0_g1	ABC transporter B family member 4-like isoform X1	ABCB1	UP
	TRINITY_DN5209_c0_g2	ABC transporter G family member 22-like isoform X1	ABCG2	DOWN
	TRINITY_DN4842_c0_g1	ABC transporter C family member 8-like isoform X2	ABCG2	UP
	TRINITY_DN12570_c0_g1	ABC transporter B family member 19	ABCB1	UP
	TRINITY_DN8761_c1_g1	ABC transporter G family member 11-like	ABCG2	UP
Calcium-transporting ATPase	TRINITY_DN14021_c0_g1	putative calcium-transporting ATPase 13, plasma membrane-type	ATP2C	UP
	TRINITY_DN2353_c0_g1	calcium permeable stress-gated cation channel 1-like isoform X1	TMEM63, CSC1	DOWN
	TRINITY_DN39279_c0_g1	putative calcium-transporting ATPase 13, plasma membrane-type	ATP2C	UP
	TRINITY_DN5377_c0_g1	calcium-transporting ATPase 4, plasma membrane-type-like	ATP2C	UP
Potassium transporter	TRINITY_DN22329_c0_g1	potassium channel AKT2/3	AKT, KAT, GORK, SKOR	DOWN
	TRINITY_DN2073_c0_g1	putative potassium transporter 12 isoform X2	kup	DOWN
	TRINITY_DN40324_c0_g5	probable potassium transporter 17	kup	UP
Magnesium transporter	TRINITY_DN8283_c0_g2	magnesium transporter MRS2-F-like isoform X1	MRS2	UP
Cadmium/zinc-transporting ATPase	TRINITY_DN7757_c0_g1	putative inactive cadmium/zinc-transporting ATPase HMA3	HMA3	UP
Nramp	TRINITY_DN31364_c0_g3	Natural resistance-associated macrophage protein	Nramp	UP
